# Supplementary material for: The association between meteorological variables and road traffic injuries: a study from Macao
Source: PeerJ. 2019 Feb 12;7:e6438. doi: 10.7717/peerj.6438 (PMC6376939; doi:10.7717/peerj.6438)
Supplement: Supplemental Information 6 [file peerj-07-6438-s006.xlsx]

## Sheet: Recovered_工作表1
YEAR_	MONTH_	DATE_	hPA	High_temp	Mean_temp	Low_temp	Delta_temp	Dew_temp	RH	Sunshine	Wind	RainFall	Population	Mild_injury_number_by_month	Hospitalisation_number_by_month	Death_number_by_month	Car_accident_incidence_by_month	Taxi_accident_incidence_by_month	Truck_accident_incidence_by_month	Motocycle_accident_incidence_by_month	Car_total_amount_by_month	Taxi_total_amount_by_month	Truck_total_amount_by_month	Motocycle_total_amount_by_month
2001	1	JAN 2001	1018.28	19.36	16.32	13.78	5.58	12.9	79.4667	3.69	16.8	1.58	43.81	2200	250	10	2.64423	33.1126	72.6895	1.14819	51811	755	3852	57482
2001	2	FEB 2001	1018.05	19.7036	16.1821	13.3964	6.30714	13.0821	81.4286	4.20714	16.2143	0.657143	43.81	2340	250	20	2.44156	26.4901	63.238	1.31979	52016	755	3811	57585
2001	3	MAR 2001	1015.94	22.9194	19.8452	17.3903	5.52903	16.5581	81.1613	3.63871	15	2.94839	43.81	2060	270	0	2.88245	30.4636	71.4097	1.35553	52039	755	3795	57542
2001	4	APR 2001	1012.9	24.2033	21.81	19.8867	4.31667	20.1233	89.9	1.59	16.4667	3.80667	43.81	2010	260	0	2.50183	31.7881	72.7517	1.29332	51962	755	3725	57217
2001	5	MAY 2001	1008.61	29.1	26.2968	24.2548	4.84516	23.8258	86.1613	4.9	14.4839	4.38065	43.81	2530	360	30	2.83917	31.7881	80.429	1.43312	52128	755	3730	57218
2001	6	JUN 2001	1006.16	29.5967	27.1233	25.0033	4.59333	25.1667	89.0333	4.02	16	24.1133	43.81	2350	180	10	2.95751	29.1391	84.5598	1.23569	52409	755	3737	57458
2001	7	JUL 2001	1004.5	30.1065	27.5032	25.1613	4.94516	25.3226	88	4.94839	19.4194	25.9806	43.81	2350	250	10	2.78388	31.7881	70.3812	1.43696	52804	755	3751	57761
2001	8	AUG 2001	1006.03	31.9452	28.7355	26.0806	5.86452	25.6452	83.3548	6.4129	13.7742	6.18065	43.81	2490	380	10	2.69415	35.7616	74.6269	1.30683	53078	755	3752	58156
2001	9	SEP 2001	1008.17	30.6867	27.6867	24.9233	5.76333	23.5167	78.4333	5.52	14.0667	11.7667	43.81	2590	390	10	3.07687	30.4636	87.0494	1.38362	53301	755	3745	58542
2001	10	OCT 2001	1015.28	29.2129	25.571	23.1194	6.09355	21.1129	75.9032	6.23548	17	0.406452	43.81	2240	270	30	2.68321	30.4636	73.0924	1.34119	53667	755	3735	58903
2001	11	NOV 2001	1019.1	24.53	20.8167	17.6233	6.90667	14.6733	67.5667	6.68667	18.3	0.04	43.81	2400	310	20	2.80273	29.1391	94.2335	1.70749	52092	755	3555	57980
2001	12	DEC 2001	1022.6	19.9323	16.5548	13.6	6.33226	12.3806	76.0323	4.16129	19.1935	1.98065	43.81	2710	230	0	3.26467	35.7616	89.0449	1.45923	52379	755	3560	58250
2002	1	JAN 2002	1021.04	19.8258	16.0645	13.0452	6.78065	12.3839	78.7097	4.49355	15	0.645161	44.42	2530	250	20	2.92209	25.1656	73.6282	1.60739	52702	755	3572	58480
2002	2	FEB 2002	1021.03	21.1643	17.65	14.8857	6.27857	14.6964	82.2143	4.88929	14.1071	0.214286	44.42	2190	270	30	2.60068	25.1656	61.9221	1.31247	53063	755	3569	58668
2002	3	MAR 2002	1016.1	24.1258	20.8484	18.329	5.79677	18.4935	86.5484	3.52258	14.2581	5.89677	44.42	2460	280	0	2.86576	21.1921	64.135	1.4665	53040	755	3555	58643
2002	4	APR 2002	1013.39	27.2233	24.1567	21.6967	5.52667	22.0233	87.7	6.01	17.4333	0.62	44.42	2360	310	30	2.70073	27.8146	96.6657	1.49115	53319	755	3569	59015
2002	5	MAY 2002	1009.59	30.1742	26.7548	24.1742	6	23.9226	84.3871	5.01935	15	7.92903	44.42	2240	360	20	3.00553	33.1126	108.063	1.61608	53568	755	3572	59403
2002	6	JUN 2002	1007	30.8167	28.0533	25.7733	5.04333	25.61	86.3333	6.31333	16.7667	10.4133	44.42	2690	320	50	2.66198	25.1656	64.8346	1.42086	54095	755	3748	59823
2002	7	JUL 2002	1003.43	31.6516	28.3935	25.9516	5.7	26.0097	86.8065	5.09355	14.4516	9.34839	44.42	2460	190	20	2.75401	29.1391	70.3437	1.47507	54466	755	3753	60336
2002	8	AUG 2002	1005.56	31.0871	28.071	25.7903	5.29677	24.0806	79.3226	6.47097	14.6129	10.7677	44.42	2590	290	0	2.5568	27.8146	79.7448	1.30127	54756	755	3762	60710
2002	9	SEP 2002	1009.83	29.1867	26.4567	24.4167	4.77	22.3833	79.3667	4.34667	17.1667	19.62	44.42	2850	300	20	3.07575	34.4371	81.7844	1.38916	54946	755	3766	61188
2002	10	OCT 2002	1014.46	27.2806	24.3129	22.2742	5.00645	19.4742	75.6452	4.2129	16.0645	2.95484	44.42	2380	280	10	2.51315	23.8411	88.9595	1.36417	55309	755	3777	61576
2002	11	NOV 2002	1018.61	23.54	20.4033	17.96	5.58	14.4167	69.8667	5.53333	18.7667	1.18	44.42	2620	280	10	2.65967	30.4636	90.9091	1.5658	55646	755	3784	61949
2002	12	DEC 2002	1020.29	20.0935	16.8	14.6935	5.4	13.3355	80.5161	3.2129	19	1.89677	44.42	2450	320	10	3.0461	29.1391	103.759	1.5443	55809	755	3778	62164
2003	1	JAN 2003	1021.62	19.2839	15.2645	12.4097	6.87419	9.83226	71.3548	5.85806	16.4516	0.277419	45.07	2450	290	10	3.0829	30.504	102.537	1.50646	56116	754	3784	62398
2003	2	FEB 2003	1018.86	21.2143	17.8571	15.8357	5.37857	14.775	82.8571	3.46071	14.1429	0.128571	45.07	2130	330	0	2.36596	30.6667	74.7565	1.2338	56214	750	3799	62409
2003	3	MAR 2003	1017.32	21.071	18.3161	16.3581	4.7129	15.7097	85.1935	2.3129	17.0323	1.11613	45.07	2510	270	0	2.7207	29.3333	76.7613	1.37325	56603	750	3804	62625
2003	4	APR 2003	1012.61	25.79	23.32	21.6467	4.14333	20.9033	86.8	3.51667	16.4333	2.34	45.07	2550	390	10	2.80216	28	70.9034	1.4347	56742	750	3808	62731
2003	5	MAY 2003	1008.89	29.0935	26.4387	24.6903	4.40323	23.1484	82.5484	4.47742	17.5806	8.59355	45.07	2750	330	0	2.83004	25.3333	78.7752	1.43994	57243	750	3821	63197
2003	6	JUN 2003	1006.35	29.5567	27.0433	24.9	4.65667	23.73	82.6333	4.27	15.6333	14.0133	45.07	2700	240	30	2.83104	29.2943	71.9687	1.46107	57576	751	3835	63652
2003	7	JUL 2003	1008.23	32.3806	29.0129	26.6	5.78065	24.3806	76.5484	10.2194	16.6452	1.06452	45.07	2770	380	20	2.8639	30.6667	93.0412	1.4961	57963	750	3880	64167
2003	8	AUG 2003	1005.7	31.3548	28.3548	26.0419	5.3129	24.6613	80.8387	6.33871	14.0645	7.65806	45.07	2820	210	40	2.6896	33.3333	93.3882	1.49867	58373	750	3887	64724
2003	9	SEP 2003	1009.17	30.45	27.24	25.13	5.32	23.51	80.7333	5.85667	16.6333	12.2467	45.07	2560	300	10	2.63983	36	94.9578	1.36403	58716	750	3907	65248
2003	10	OCT 2003	1015.39	28.6806	24.8806	22.3	6.38065	18.7581	69.7097	6.87097	15	1.34839	45.07	3010	310	0	2.55132	34.6667	98.7433	1.53619	59185	750	3899	65747
2003	11	NOV 2003	1017.53	25.2033	21.47	18.98	6.22333	16.2967	73.4	5.26333	17.5333	0.126667	45.07	2950	130	20	2.63336	30.6667	102.953	1.39217	59240	750	3895	66084
2003	12	DEC 2003	1022.34	21.4032	16.7774	13.5613	7.84194	8.97742	61.7742	7.24839	16.6774	0.0903226	45.07	3010	340	30	2.70334	30.6667	89.8158	1.46087	59556	750	3908	66399
2004	1	JAN 2004	1020.91	18.2419	14.5839	12.2258	6.01613	9.65806	73.3548	3.51613	17.7419	1.2129	45.85	2660	310	0	2.60343	32	69.455	1.43691	59921	750	3945	66810
2004	2	FEB 2004	1018.93	20.2483	16.4138	14.0103	6.23793	12.3552	78.3448	4.14828	14.7931	1.55172	45.85	2780	280	20	2.42779	30.6667	83.5226	1.19174	60137	750	3963	67129
2004	3	MAR 2004	1016.28	21.0968	18.3677	16.6258	4.47097	14.9226	81.2581	2.09032	15.7419	1.80645	45.85	2770	330	10	2.37698	33.3333	95.6588	1.30307	60581	750	3962	67533
2004	4	APR 2004	1013.07	25.1467	22.4	20.52	4.62667	19.5167	84.1333	3.30333	15.0667	2.38667	45.85	2460	280	10	2.4182	30.6667	95.2742	1.22967	60789	750	3957	67498
2004	5	MAY 2004	1009.43	28.8484	25.6742	23.4194	5.42903	22.5065	83.129	4.88065	14.1935	11.5161	45.85	3040	330	0	2.87022	33.3333	96.9207	1.6037	60971	750	3962	67968
2004	6	JUN 2004	1007.29	31.5433	28.3533	26.1533	5.39	23.8633	77.2667	7.46667	15.4	2.47333	45.85	3350	210	0	2.45816	33.3333	68.4211	1.32754	61428	750	3990	68548
2004	7	JUL 2004	1007.19	30.5968	28.0032	26.0194	4.57742	24.5935	82.0645	5.42258	16.6774	5.32903	45.85	3750	330	10	2.74765	33.2889	96.1395	1.35879	61871	751	4015	69179
2004	8	AUG 2004	1004.03	31.4323	28.329	25.9806	5.45161	24.3935	79.9677	5.45484	12.5484	16.7548	45.85	3510	230	20	2.5527	33.3333	103.278	1.20301	62287	750	4057	69825
2004	9	SEP 2004	1010.68	30.89	27.4433	25.01	5.88	22.2267	74.3	6.92333	12.3333	6.28	45.85	3190	310	40	2.62714	33.3333	84.0274	1.23425	62806	750	4082	70488
2004	10	OCT 2004	1016.75	28.1968	24.3871	21.7323	6.46452	15.8903	60.3226	8.1129	15.1935	0.0516129	45.85	3500	260	20	2.37135	29.3333	79.6784	1.42189	63255	750	4104	71032
2004	11	NOV 2004	1019.27	25.39	21.8767	19.45	5.94	15.76	69.4333	5.21667	15.4333	0	45.85	3450	140	20	2.55566	26.6667	96.4001	1.57099	63780	750	4139	71929
2004	12	DEC 2004	1020.04	22.2	18.0097	15.2742	6.92581	6.92581	65.3548	6.0129	16.2903	0	45.85	3550	310	10	2.65974	34.6667	96.6427	1.40635	63916	750	4170	72528
2005	1	JAN 2005	1020.25	17.7129	14.3935	12.1129	5.6	8.80323	70.9677	3.0871	14.2903	0.258065	46.81	3190	270	10	2.36131	28	82.1787	1.22114	64371	750	4186	72883
2005	2	FEB 2005	1018.52	17.1071	14.775	13.0607	4.05	12.4929	86.6429	0.721429	16.1429	1	46.81	2670	270	0	2.30493	26.6667	59.9714	1.01092	64644	750	4202	73201
2005	3	MAR 2005	1019.3	18.9839	16.1839	13.9419	5.04	13.1581	83.2258	2.1	15.3935	1.99355	46.81	2920	230	10	2.37219	29.3333	86.1335	1.04662	64919	750	4226	73570
2005	4	APR 2005	1014.71	24.5967	22.0433	20.2667	4.33	19.7133	86.9667	2.21	14.0667	1.12667	46.81	2880	330	0	2.25436	32	75.2714	1.19324	65207	750	4238	73749
2005	5	MAY 2005	1008.25	28.8839	26.5258	24.9065	3.98	24.0871	86.8065	4.24839	16.5806	12.4258	46.81	3770	360	30	2.73061	28	89.7227	1.32031	65553	750	4291	74225
2005	6	JUN 2005	1005.07	29.35	27.1267	25.5767	3.77	24.76	87.1	2.92	15.6667	16.12	46.81	3520	250	20	2.54534	29.3333	88.1262	1.09449	66003	750	4312	74921
2005	7	JUL 2005	1007.04	31.2774	28.4677	26.3097	4.97	24.7484	80.8387	7.1	13.3871	6.20645	46.81	3350	450	20	2.78062	30.6667	82.512	1.18952	66532	750	4363	75661
2005	8	AUG 2005	1005.45	30.5484	27.7903	25.8129	4.74	24.8774	84.5161	6.29355	14.3548	13.4323	46.81	3430	380	30	2.31883	23.968	87.917	1.04851	66844	751	4436	76299
2005	9	SEP 2005	1009.82	31.18	28.0633	25.7967	5.38	23.98	79.1	5.89	15.1333	6.25333	46.81	3510	240	20	2.21167	34.6667	85.9739	1.11477	67370	750	4513	77146
2005	10	OCT 2005	1015.39	29.3226	25.8935	23.5323	5.79	19.829	69.8065	6.25806	15.4194	0.0322581	46.81	3620	330	0	2.18835	31.9574	79.8596	1.15851	67631	751	4558	77686
2005	11	NOV 2005	1017.08	26.02	22.4433	20.1433	5.88	17.4333	74	6.39667	14.8333	3.31333	46.81	3140	270	20	2.17414	28.9474	77.5713	1.09649	68073	760	4628	78432
2005	12	DEC 2005	1021.71	19.3452	16.0806	13.5774	5.77	7.60323	59.3548	4.70323	19.3548	0.0516129	46.81	3490	260	20	2.1512	32.8515	72.7312	1.12921	68334	761	4661	78816
2006	1	JAN 2006	1019.1	18.7839	15.6194	13.4581	5.33	11.2452	76.3226	2.89355	15.7419	0.458065	47.98	3170	310	10	2.11023	25.6739	69.5392	0.985944	68713	779	4688	79112
2006	2	FEB 2006	1020.35	20.7964	17.325	15.2179	5.58	13.525	79	2.96786	13.9643	2.17857	47.98	2840	240	0	1.84456	19.4301	54.6541	0.930127	68851	772	4684	79559
2006	3	MAR 2006	1015.78	20.4129	17.8968	15.9032	4.51	15.1871	84.6452	1.81935	13.871	2.22581	47.98	3180	250	30	2.1458	24.2967	71.08	0.914512	68972	782	4713	79824
2006	4	APR 2006	1012.22	25.7433	23.2167	21.3	4.44	20.7167	86.0667	2.71	14.7667	3.22667	47.98	2920	360	0	2.07355	25.641	75.4516	0.941691	68964	780	4705	79644
2006	5	MAY 2006	1010.54	27.6	25.3452	23.4194	4.18	22.1742	83.4194	4	16.9355	14.0323	47.98	4020	220	20	2.48157	30.7692	70.6579	1.03631	69311	780	4727	80092
2006	6	JUN 2006	1007.4	29.4667	27.3833	25.6267	3.84	24.88	86.4333	3.68333	14.7667	14.78	47.98	3380	330	10	2.03827	20.5128	62.9606	0.879976	69667	780	4749	80684
2006	7	JUL 2006	1004.19	31.3645	28.8645	26.9387	4.43	25.4323	82.2258	6.4	15.4194	7.14194	47.98	3810	400	10	2.15659	30.7692	82.9156	1.08063	70018	780	4788	81434
2006	8	AUG 2006	1005.59	31.2613	28.171	26.1097	5.15	24.8161	82.4194	6.20968	14.6774	11.9548	47.98	3690	350	20	1.97657	24.2038	68.4677	0.875593	70324	785	4849	82230
2006	9	SEP 2006	1010.19	29.43	26.2733	24.24	5.19	22.07	78.3333	4.63	14.2667	6.28	47.98	3470	260	30	2.06629	24.3278	60.761	0.876982	70658	781	4888	83240
2006	10	OCT 2006	1015.25	30.1419	26.4065	24.2968	5.85	21.129	73.5484	5.36774	12.0968	0.0322581	47.98	3200	230	0	1.94046	21.767	66.0838	0.870447	71117	781	4918	83865
2006	11	NOV 2006	1016.1	26.15	22.8167	20.5833	5.57	17.6733	74.6667	3.72	14.3	2.68667	47.98	3240	340	20	1.97073	20.5128	62.8421	0.895466	71547	780	4933	84872
2006	12	DEC 2006	1021.34	21.0323	17.5452	14.8226	6.21	10.8839	66.4194	6.12903	17.129	0.529032	47.98	3410	280	30	2.04947	23.0769	58.0905	0.913691	71726	780	4975	85368
2007	1	JAN 2007	1022.88	18.9387	15.3129	12.7484	6.19	8.74516	66.6774	4.46452	16.2581	0.541935	49.32	3700	240	40	2.20228	23.0769	70.8458	0.895984	72198	780	5025	85939
2007	2	FEB 2007	1017.96	22.425	19.3357	17.425	5	15.2321	78.6071	3.85357	13.0357	0.507143	49.32	3040	230	0	1.87498	21.767	67.6587	0.798565	72534	781	5040	86405
2007	3	MAR 2007	1015.65	21.9194	19.4839	17.8097	4.11	17.0806	86.2258	1.31935	13.7097	0.548387	49.32	3960	340	0	1.84127	21.7949	64.3554	0.931088	72776	780	5019	86995
2007	4	APR 2007	1015.08	23.7667	20.9967	18.7633	5	17.96	83.6333	3.43333	15.0333	5.12667	49.32	3210	330	0	1.65915	18.7266	54.3264	0.781142	72929	801	5062	87052
2007	5	MAY 2007	1010.12	29.3871	26.0903	23.9258	5.46	22.5452	81.6129	5.4129	11.8387	10.3419	49.32	3430	360	10	1.82524	21.7129	63.1097	0.854156	73415	829	5023	87806
2007	6	JUN 2007	1006.6	30.48	28.0267	26.0767	4.4	25.1467	84.6333	6.02667	13.9	13.62	49.32	3390	220	20	1.94064	20.4327	65.6675	0.72309	73687	832	5071	88509
2007	7	JUL 2007	1007.16	32.0032	29.1258	27.0161	4.99	25.0581	79	10.1355	14.9677	1.26452	49.32	3700	280	10	1.99566	21.6867	66.1319	0.817423	74161	830	5111	89305
2007	8	AUG 2007	1004.36	30.8613	27.8871	25.6839	5.18	24.729	83.4839	5.34516	12.4516	11.0903	49.32	3070	510	10	1.90356	23.9521	65.2384	0.787576	74597	835	5181	90150
2007	9	SEP 2007	1008.02	30.6	27.4533	25.45	5.15	22.42	74.9	5.08	12.8667	2.81333	49.32	3580	380	40	1.8795	17.8998	56.5493	0.805286	75020	838	5199	90651
2007	10	OCT 2007	1014.32	28.8032	25.4097	23.2742	5.53	19.5968	71.1613	5.47097	14.1613	1.12903	49.32	3680	250	20	1.76744	23.753	60.4669	0.825264	75250	842	5226	90880
2007	11	NOV 2007	1018.01	24.3233	20.4467	17.7733	6.55	12.95	63.8667	6.35333	16.4667	0.513333	49.32	3050	200	20	1.51671	19.2771	57.3164	0.685879	75822	830	5269	91853
2007	12	DEC 2007	1018.91	22.6839	18.6484	16.3	6.38	13.129	71.4839	4.86452	12.3226	0.574194	49.32	3030	270	0	1.65535	18.0288	48.1973	0.671752	76117	832	5270	92296
2008	1	JAN 2008	1020.33	17.4968	14.2839	11.9097	5.59	9.21613	74	3.22581	15.9677	0.864516	50.75	2780	290	10	1.83083	22.8916	49.0159	0.679751	76468	830	5284	92681
2008	2	FEB 2008	1022.12	14.9621	11.9345	9.63793	5.32	6.23448	69.8966	2.65862	15.8276	0.834483	50.75	2980	200	0	1.60472	18.0072	53.8142	0.656599	76649	833	5296	92903
2008	3	MAR 2008	1016.49	23.4355	19.3645	16.9355	6.5	14.9194	77	4.6129	11.6774	1.16774	50.75	3100	250	0	1.61246	15.9453	59.4676	0.665479	76901	878	5297	93166
2008	4	APR 2008	1012.89	24.8933	22.5033	20.9733	3.92	19.9733	85.9	2.44	13.5333	5.15333	50.75	3410	240	0	1.7358	13.4298	62.287	0.63132	77198	968	5282	93455
2008	5	MAY 2008	1008.83	27.6548	24.9129	22.9226	4.73	21.8355	83.6129	3.69677	12.7419	6.20645	50.75	3930	210	20	1.55803	17.0854	48.2901	0.690755	77662	995	5322	94100
2008	6	JUN 2008	1006.67	28.27	26.2	24.5067	3.76	24.1233	88.6	2.88	13.6	40.1333	50.75	3550	260	0	1.74646	17.0854	48.3119	0.677657	77872	995	5361	94443
2008	7	JUL 2008	1006.28	30.7065	27.8839	25.7097	5	24.6129	82.8065	6.50968	10.4194	16.2774	50.75	3650	280	0	1.91772	23.8806	53.8233	0.798127	78218	1005	5388	95223
2008	8	AUG 2008	1006.5	30.6677	27.7968	25.7	4.97	24.3452	82.0323	7.74516	11.1613	9.29032	50.75	3140	260	0	1.60669	20.3252	50.2773	0.615661	78422	984	5410	95832
2008	9	SEP 2008	1007.67	32.7867	28.5867	25.7667	7.02	21.5333	67.1333	6.82	12.2333	5.48667	50.75	3640	300	30	1.53856	16.2437	45.8648	0.661998	78645	985	5429	96677
2008	10	OCT 2008	1013.92	29.6129	25.8516	23.8516	5.76	20.0032	70.7097	5.60323	13.1935	6.68387	50.75	3860	340	20	1.42231	15.3061	42.295	0.750627	78745	980	5438	97252
2008	11	NOV 2008	1017.93	24.9467	21.24	18.6033	6.34	12.6733	59.8667	6.67333	18.5333	0.24	50.75	3860	360	10	1.51783	20.4082	51.5596	0.755943	79060	980	5450	97891
2008	12	DEC 2008	1019.7	21.5839	17.6129	14.6226	6.96	8.67742	57.5161	5.61613	15.6452	0.174194	50.75	3790	380	0	1.48566	19.3878	48.8479	0.716303	78753	980	5425	97724
2009	1	JAN 2009	1021.76	18.5677	14.2355	11.2677	7.3	5.77742	58.8387	6.05806	16.1935	0.0193548	52.16	3020	190	0	1.52039	17.3469	42.7916	0.652509	78927	980	5445	98083
2009	2	FEB 2009	1015.13	23.9429	19.85	17.8107	6.13	15.6071	77.3571	3.88571	9.89286	0.0785714	52.16	3130	260	20	1.37922	18.3486	35.0202	0.57928	79030	981	5454	98398
2009	3	MAR 2009	1015.03	21.1935	18.2903	16.3226	4.87	15.3452	83.5161	1.62581	12.3548	4.63871	52.16	3070	290	0	1.55953	19.3286	50.4047	0.629889	78870	983	5436	98430
2009	4	APR 2009	1012.42	24.2233	21.1533	19.1767	5.05	16.6467	76.5667	3.38333	12.8333	5.86	52.16	3910	210	0	1.41051	22.3805	45.1768	0.651062	78695	983	5401	98301
2009	5	MAY 2009	1010.59	28.0226	24.5097	22.3484	5.67	19.4871	74.6774	5.63871	11.2903	10.2	52.16	3180	290	10	1.56141	18.3486	37.9374	0.688127	78775	981	5430	98819
2009	6	JUN 2009	1004.58	30.3167	27.1833	24.9267	5.39	22.1633	74.6333	4.72333	9.06667	8.58667	52.16	3160	170	20	1.45619	20.3874	45.5556	0.593484	78973	981	5400	99413
2009	7	JUL 2009	1004.82	31.3484	28.0935	25.5806	5.77	22.5548	72.5484	7.67742	10.5484	7.4	52.16	3920	240	0	1.52641	20.284	45.9855	0.658821	79271	986	5393	100179
2009	8	AUG 2009	1004.68	32.7581	28.6516	26.0871	6.67	22.3935	70.0645	6.8	8.96774	7.03871	52.16	4470	210	30	1.58656	19.3483	45.1183	0.665541	79417	982	5408	100670
2009	9	SEP 2009	1007.27	32.1933	28.12	25.7933	6.4	21.7833	69.6667	6.01667	15	6.27333	52.16	3500	250	20	1.51821	16.2933	54.418	0.583483	79699	982	5421	101117
2009	10	OCT 2009	1012.32	29.1839	25.5613	23.2581	5.93	18.2387	65.2903	6.46129	12.7097	0.496774	52.16	4210	210	20	1.48016	21.4067	48.2708	0.650394	79721	981	5407	101477
2009	11	NOV 2009	1017.79	22.6767	18.8567	16.1433	6.53	12.4133	67.6333	5.40667	16.4333	0.673333	52.16	3740	250	10	1.42093	22.4261	51.192	0.636195	80229	981	5411	102170
2009	12	DEC 2009	1019.33	18.9613	15.8323	13.5516	5.41	11.2226	75.3548	3.50645	14.7097	1.69677	52.16	4500	330	10	1.6025	21.4286	50.6819	0.672738	80499	980	5426	102566
2010	1	JAN 2010	1020.34	18.5194	15.3548	13.1355	5.35	11.5548	78.871	2.63226	12.6129	1.09032	53.46	4470	250	0	1.48544	21.4286	42.2872	0.661601	80784	980	5439	102781
2010	2	FEB 2010	1016.32	18.7821	16.3429	14.8	4.11	13.9214	85.8214	0.914286	13.2857	3.43571	53.46	3600	200	0	1.50927	21.4286	39.4351	0.575239	80834	980	5452	102566
2010	3	MAR 2010	1017.3	21.7677	18.8065	16.7548	4.94	15.6323	82.8065	2.6129	13.5806	1.01935	53.46	3770	210	10	1.31128	14.2857	39.3889	0.594391	80837	980	5433	102626
2010	4	APR 2010	1015.26	22.72	20.13	18.1533	4.46	18.66	91.4667	0.82	13.1	4.84	53.46	3730	210	20	1.42056	18.3673	45.5048	0.564933	80954	980	5428	102667
2010	5	MAY 2010	1008.59	28.1484	24.9452	22.9903	5.34	22.3387	86.1935	3.17742	10.4516	8.94194	53.46	3910	220	0	1.44	18.3673	45.4797	0.601877	81250	980	5431	103011
2010	6	JUN 2010	1007.55	28.5367	26.1233	24.5167	3.97	23.3	84.9	2.48	9.93333	17.2533	53.46	4830	430	0	1.66722	20.4082	50.0462	0.664753	81573	980	5415	103798
2010	7	JUL 2010	1007.88	31.871	28.4613	26.0452	5.83	24.0161	77.5806	8.46452	9.96774	4.96774	53.46	4620	150	0	1.60014	19.3878	51.2962	0.626005	81868	980	5439	103833
2010	8	AUG 2010	1007.99	32.1258	28.1935	25.2581	6.87	23.5387	77.0323	7.22258	9.22581	8.58065	53.46	4460	340	20	1.49511	23.4455	58.8991	0.584739	82268	981	5450	104320
2010	9	SEP 2010	1008.69	31.13	27.3467	24.6967	6.43	23.33	79.9	5.16333	8.8	18.1	53.46	3850	220	10	1.49813	20.3874	52.5835	0.562671	82770	981	5477	104857
2010	10	OCT 2010	1012.56	27.6161	24.0452	21.7839	5.83	18.3484	71.5806	5.13871	19.0323	1.49032	53.46	3660	250	10	1.42117	11.213	39.9125	0.474888	83030	981	5487	105288
2010	11	NOV 2010	1017.22	24.92	20.6033	17.9	7.02	15.5433	74.1667	6.57667	13.1667	1.24	53.46	4730	360	20	1.54545	16.3265	44.3269	0.622653	83471	980	5482	105998
2010	12	DEC 2010	1016.39	21.5065	17.1065	13.8516	7.65	11.3194	70.8387	5.60968	13.9355	0.793548	53.46	4340	220	10	1.59754	13.2653	56.0731	0.657771	83879	980	5475	106420
2011	1	JAN 2011	1021.75	15.371	11.5258	8.87742	6.49	5.9129	69.7097	4.62581	18.3226	0.419355	54.63	4180	250	20	1.62218	18.3673	58.8984	0.692696	84454	980	5501	106829
2011	2	FEB 2011	1017.13	18.4	14.7	12.5357	5.86	11.5357	82.5	3.63214	11.3929	0.885714	54.63	3660	180	10	1.38557	15.3061	33.9292	0.478339	84442	980	5482	106619
2011	3	MAR 2011	1018.78	20	16.529	14.1258	5.87	11.9516	75.7097	2.03871	13.9677	0.748387	54.63	3950	260	0	1.47526	16.3265	55.6267	0.589761	84731	980	5465	106823
2011	4	APR 2011	1014.01	26.45	22.0367	19.4233	7.03	18.1633	79.9	5.64	9.33333	0.953333	54.63	3870	180	0	1.35068	14.2857	47.0848	0.5036	85142	980	5437	107228
2011	5	MAY 2011	1009.18	28.8129	25.129	22.7871	6.03	21.4484	81.3226	4.73871	10.5806	4.96774	54.63	4620	220	0	1.70978	17.3469	65.6975	0.603461	85391	980	5434	107712
2011	6	JUN 2011	1005.07	30.6133	27.6	25.46	5.15	24	81.3667	5.24667	11	13.1533	54.63	5220	210	10	1.48058	15.3061	62.0283	0.554641	85777	980	5433	108178
2011	7	JUL 2011	1004.39	31.5226	27.9645	25.5871	5.94	23.8968	79.3548	6.94194	8.96774	5.29032	54.63	4170	190	0	1.49652	15.3061	48.5553	0.543183	86200	980	5849	108619
2011	8	AUG 2011	1006.17	32.6548	28.8452	26.0774	6.58	23.4548	73.8387	8.27419	8.54839	5.20645	54.63	4750	200	30	1.52218	18.3673	79.8219	0.539902	86718	980	5838	109279
2011	9	SEP 2011	1007.63	30.78	27.1333	24.6533	6.13	22.5067	76.5333	5.16	14.7	4.77333	54.63	4100	270	10	1.2647	16.3265	69.9863	0.500291	86977	980	5844	109936
2011	10	OCT 2011	1013.99	27.3806	23.9226	21.8613	5.52	19.5968	77.8387	4.59355	16.2258	5.70323	54.63	5010	190	10	1.53171	23.4694	81.233	0.534822	87484	980	5872	110317
2011	11	NOV 2011	1015.5	25.6567	22.1533	20.1367	5.52	17.8433	77.5333	3.88	15.4667	2.64667	54.63	4500	230	10	1.3059	19.3878	73.8791	0.504777	88062	980	5888	110940
2011	12	DEC 2011	1021.1	19.4484	15.5516	12.8129	6.64	8.21935	63.2258	5.77097	19.4516	0.0193548	54.63	4400	240	20	1.43372	18.3673	74.2692	0.539578	88581	980	5884	111198
2012	1	JAN 2012	1019.58	15.9742	13.0581	11.1129	4.86	10.0548	82.7742	2.2	15.9355	1.38065	55.68	4560	180	10	1.59098	17.3469	67.673	0.563834	89253	980	5896	111735
2012	2	FEB 2012	1016.88	17.3241	14.3931	12.3034	5.02	11.831	85.2759	0.948276	14.5862	0.944828	55.68	3880	220	10	1.30924	12.2449	61.048	0.465649	89365	980	5897	111672
2012	3	MAR 2012	1015.6	21.0581	17.8645	15.7452	5.31	15.0226	85.0645	2.46129	13.1935	0.606452	55.68	3950	170	0	1.43769	13.2653	62.8707	0.52812	89727	980	5901	111717
2012	4	APR 2012	1011.16	25.3067	22.7267	20.9433	4.36	20.5367	88.0333	2.11333	11.1667	12.3333	55.68	3340	200	10	1.42012	10.2041	61.9064	0.410934	90133	980	5896	111940
2012	5	MAY 2012	1007.34	29.4774	26.5419	24.8129	4.66	23.1935	82.1935	4.81935	11.6774	4.07742	55.68	3910	230	20	1.41365	14.2857	62.3517	0.454096	90546	980	5902	112311
2012	6	JUN 2012	1002.43	30.2067	27.3267	25.27	4.94	23.78	81.5	4.60333	12.2333	6.09333	55.68	4380	170	10	1.51107	13.2653	67.8052	0.479386	91326	980	5914	112644
2012	7	JUL 2012	1004.37	30.6645	27.7935	25.6613	5	23.7903	79.6452	7.60645	11.5161	12.7226	55.68	4940	250	10	1.5842	14.2857	75.8725	0.477378	92160	980	5931	113118
2012	8	AUG 2012	1003.4	32.4387	28.629	25.9935	6.45	23.4161	74.6774	5.97742	9.16129	5.27742	55.68	4060	240	40	1.41473	16.3265	75.7703	0.475637	92597	980	5939	113532
2012	9	SEP 2012	1010.31	30.8867	27.2733	24.7333	6.15	21.22	70.8333	7.00667	13.3	1.76667	55.68	4490	270	10	1.33073	15.3061	64.603	0.508014	93182	980	5944	114170
2012	10	OCT 2012	1014.26	29.4419	25.1581	22.8806	6.56	19.0161	70.129	6.75161	13.7742	2.01935	55.68	3500	190	30	1.13128	13.0653	64.9832	0.427354	93699	995	5940	114659
2012	11	NOV 2012	1015.52	23.86	20.92	19.04	4.82	17.6	82.5	3.25667	14.6667	2.34	55.68	4620	270	30	1.35639	15.6863	89.8839	0.47688	94368	1020	5941	115333
2012	12	DEC 2012	1018.39	19.4935	16.3581	14.0194	5.47	12.9258	81	2.7129	16.5161	1.41935	55.68	4330	150	0	1.38855	12.2873	78.461	0.475684	95063	1058	5952	115623
2013	1	JAN 2013	1020.6	19.1129	15.2161	12.7161	6.5	10.4258	73.9677	5.16129	13.5484	0.0516129	56.64	3810	200	30	1.30923	15.9574	57.7986	0.465505	96240	1128	5969	116003
2013	2	FEB 2013	1018.28	22.0214	17.9464	15.7679	6	14.7107	82.1429	2.71429	11.5714	0.0785714	56.64	3030	220	10	1.09913	11.4638	43.5584	0.353894	96440	1134	5969	115854
2013	3	MAR 2013	1015.52	22.9129	19.6355	17.6032	5.41	16.4677	83.6774	3.46774	10.4839	4.2129	56.64	4300	220	10	1.24058	12.8205	60.7827	0.448992	96729	1170	6005	115815
2013	4	APR 2013	1012.21	23.0967	20.68	18.8233	4.3	18.6267	88.6	1.49667	11.6333	6.66667	56.64	3990	220	20	1.26674	14.5175	63.4657	0.397096	97100	1171	6019	115841
2013	5	MAY 2013	1008.8	27.8806	25.071	23.0871	4.78	23.4839	91.0968	2.9	9.22581	21.8645	56.64	4570	210	10	1.33214	12.7986	65.9578	0.431094	97587	1172	6019	115984
2013	6	JUN 2013	1005.56	30.2667	27.5633	25.4133	4.93	25.1967	87.4	6.15333	10.7	8.86667	56.64	4110	160	20	1.33754	14.4681	71.3811	0.39561	97941	1175	6024	116276
2013	7	JUL 2013	1007.15	30.4548	27.5161	25.2581	5.13	25.0419	86.9355	6.16452	10.2258	12.4516	56.64	5120	100	20	1.42004	17.8571	71.9201	0.479744	98589	1176	6104	116729
2013	8	AUG 2013	1004.93	30.8097	28.0194	25.6677	5.14	25.5065	86.5806	5.62581	10.7419	7.75484	56.64	4070	310	0	1.28168	13.5708	71.9189	0.418274	99089	1179	6118	117148
2013	9	SEP 2013	1008.82	30.0267	26.9667	24.9467	5.08	23.7667	83.3667	5.49667	12.6	16.6067	56.64	4460	270	20	1.42599	12.7334	79.8504	0.45024	99580	1178	6149	117715
2013	10	OCT 2013	1014.43	28.7	24.9613	22.5581	6.14	18.6419	69.2258	7.3871	12.4194	0.270968	56.64	3880	130	20	1.16721	11.8745	57.9075	0.380302	100239	1179	6165	118327
2013	11	NOV 2013	1017.66	23.9133	20.8267	18.5433	5.37	15.81	74.4333	3.61333	14.8667	2.06667	56.64	4650	310	30	1.31759	14.419	74.7136	0.504066	100942	1179	6197	119032
2013	12	DEC 2013	1020.09	18.0742	14.7065	12.2	5.87	7.33226	63.0968	6.1871	14.0645	2.96774	56.64	4220	150	0	1.20141	12.7226	62.5903	0.452061	101547	1179	6231	119453
2014	1	JAN 2014	1021.57	19.3065	15.5129	12.6968	6.63	9.44516	68.9032	6.71935	11.6129	0	63.62	3740	130	10	1.1402	11.0357	62.5	0.424876	102614	1178	6272	120035
2014	2	FEB 2014	1018.06	17.1857	14.2286	11.8929	5.16	11.425	83.8929	2.68214	11.9286	0.964286	63.62	3870	160	30	1.16795	14.419	58.8892	0.433597	102744	1179	6266	119927
2014	3	MAR 2014	1017.31	20.4903	17.9452	16.2419	4.28	15.5581	86.5806	1.84839	11	2.69032	63.62	3810	160	10	1.16382	15.2672	74.015	0.40863	103109	1179	6269	119913
2014	4	APR 2014	1013.59	24.93	22.1233	20.5	4.47	20.3267	90.0333	2.77667	10.1	3.26	63.62	3810	190	0	1.0525	12.7226	57.8788	0.35828	103563	1179	6289	120018
2014	5	MAY 2014	1009.54	28.3516	25.8	23.9871	4.32	24.0129	90.3226	4.26774	9.54839	18.0387	63.62	4760	270	20	1.21071	14.419	77.5835	0.407122	104071	1179	6290	120357
2014	6	JUN 2014	1004.01	31.7667	28.4867	26.1333	5.61	25.47	84.2333	5.85	8.26667	6.05333	63.62	4270	160	0	1.14637	16.1154	71.7908	0.372255	104678	1179	6310	120885
2014	7	JUL 2014	1005.57	32.6613	29.1677	26.5387	6.16	25.8452	82.8065	7.35806	8.12903	4.97419	63.62	4560	130	0	1.28104	14.419	74.7826	0.411391	105383	1179	6325	121539
2014	8	AUG 2014	1007.18	31.7677	28.3	25.7387	6.03	25.4548	85.0323	7.2129	7.54839	7.74194	63.62	4440	240	10	1.29392	14.419	74.0624	0.384839	105880	1179	6346	122129
2014	9	SEP 2014	1008.71	32.0133	28.3467	25.79	6.22	24.6567	80.9	8.15	10.1667	2.86	63.62	4710	180	20	1.25095	14.3946	71.1699	0.422936	106319	1181	6351	122950
2014	10	OCT 2014	1014.96	29.2258	25.7	23.4226	5.8	20.2194	72.6452	6.77097	11.7097	1.8129	63.62	4020	210	30	1.1135	13.278	73.5917	0.364243	106870	1205	6373	123544
2014	11	NOV 2014	1017.3	25.1233	21.6433	19.6567	5.47	18.1967	81.4	4.16333	11.6667	1.89333	63.62	4780	210	10	1.29347	13.6986	83.9695	0.442727	107463	1241	6419	124230
2014	12	DEC 2014	1022.1	17.6774	14.7677	12.3516	5.33	9.10968	71.0645	3.49355	17.0645	1.34839	63.62	5070	220	0	1.28714	11.7096	79.0691	0.472355	107991	1281	6488	124906
2015	1	JAN 2015	1021.47	19.4355	15.6452	13.229	6.21	10.8194	74.3226	6.07097	12.129	0.890323	64.48	4300	250	20	1.00114	8.80705	61.1187	0.398048	108876	1249	6561	125613
2015	2	FEB 2015	1019.55	19.775	16.6857	14.8821	4.89	13.2821	81.5714	2.10714	10.3214	1.25714	64.48	4300	150	0	1.0187	8.6478	66.1709	0.406028	108962	1272	6589	125607
2015	3	MAR 2015	1017.79	21.4871	19	17.4097	4.14	17.4161	91.129	1.14194	9.77419	0.412903	64.48	4490	230	30	1.04498	11.245	54.1324	0.398146	109093	1245	6558	125582
2015	4	APR 2015	1014.3	25.7733	22.44	20.1333	5.53	19.24	83.6333	4.94	10.8667	1.72	64.48	4230	180	20	1.01478	10.3257	58.0303	0.365756	109383	1259	6600	125767
2015	5	MAY 2015	1008.66	29.1194	26.629	24.771	4.31	24.8	90.0323	3.26452	9.67742	10.6065	64.48	4450	220	0	1.10157	13.0933	68.9707	0.348974	109843	1222	6626	126084
2015	6	JUN 2015	1007.35	31.55	28.82	26.7333	4.84	25.8633	84.3	7.91	9.03333	4.91333	64.48	3610	250	20	1.09938	10.6645	66.8065	0.339916	110062	1219	6676	126502
2015	7	JUL 2015	1004.43	31.5452	28.4516	26.2129	5.32	25.1613	82.9032	5.49355	9.54839	3.76129	64.48	4550	210	0	1.14216	12.2249	71.5452	0.433371	110317	1227	6737	126912
2015	8	AUG 2015	1006.44	32.129	28.7355	26.2968	5.91	25.0516	81.3871	6.5129	7.35484	4.87097	64.48	4460	190	0	1.09366	12.205	79.3604	0.361093	110638	1229	6754	127391
2015	9	SEP 2015	1010.47	30.7433	27.54	25.5333	5.16	24.16	82.4	6.82667	8.73333	4.84667	64.48	3780	150	10	1.08269	13.0187	64.3834	0.33566	110835	1229	6803	128106
2015	10	OCT 2015	1014.74	28.6935	25.2161	22.6871	5.95	21.1677	79.2258	5.17742	11.3226	8.16774	64.48	3960	160	10	1.0805	10.5008	71.6674	0.357693	111060	1238	6879	128602
2015	11	NOV 2015	1017.64	26.1333	22.8533	20.8067	5.37	19.3333	81.1	4.13667	11.6333	0.333333	64.48	4020	250	10	0.932903	9.38967	70	0.348491	111480	1278	6900	129128
2015	12	DEC 2015	1021	19.6065	16.7	14.7226	4.88	13.1839	80.9355	2.12903	13.3548	1.98065	64.48	4280	240	30	1.17801	12.9081	71.5625	0.393385	112053	1317	6931	129644
2016	1	JAN 2016	1020.53	17.5903	14.7581	12.8645	4.66	12.1935	85.4839	1.97742	13.5161	8.97419	64.48	3830	170	0	1.01069	10.3321	70.7331	0.32178	112794	1355	6984	130524
2016	2	FEB 2016	1022.37	17.4069	13.9069	11.4655	5.64	9.45172	76.7931	3.21034	13.8966	1.28276	64.48	3740	170	10	1.01479	12.4269	53.8418	0.315443	112339	1368	7002	129976
2016	3	MAR 2016	1017.67	19.4387	16.6774	14.7097	5.94	14.371	87.2258	2.09032	9.96774	7.44516	64.48	3890	160	30	1.05432	11.2444	57.3176	0.324209	111920	1334	7031	129546
2016	4	APR 2016	1011.41	24.8	22.4467	20.88	4.73	21.4733	94.5333	0.556667	8.5	6.62667	64.48	2970	190	0	0.807791	11.8017	55.9411	0.247521	111415	1271	7061	129282
2016	5	MAY 2016	1009.58	28.6968	25.9	23.6452	3.92	23.7161	88.1613	4.46774	10.1613	7.18065	64.48	3800	160	0	0.970507	11.9332	64.4476	0.324329	111282	1257	7060	129498
2016	6	JUN 2016	1007.6	31.2	28.39	26.2567	5.05	25.8267	86.3333	6.60333	7.33333	11.5933	64.48	3530	110	0	1.0158	11.9808	66.3848	0.316363	111242	1252	7095	129598
2016	7	JUL 2016	1006.94	32.0516	28.9194	26.3645	4.94	25.6806	83.1935	7.85484	8.12903	7.44516	64.48	3210	280	20	0.953829	9.6	58.2551	0.300566	111131	1250	7141	129755
2016	8	AUG 2016	1002.8	31.4129	27.8226	25.5097	5.69	25.371	87.0645	4.3	7.90323	13.5871	64.48	3630	270	10	1.04406	9.6	57.4489	0.314936	111105	1250	7189	130185
2016	9	SEP 2016	1007.28	30.7067	27.3867	25.15	5.9	23.8667	82.0667	4.62	9.26667	5.4	64.48	3070	200	10	0.864647	7.20576	51.2609	0.306949	111028	1249	7257	130315
2016	10	OCT 2016	1010.87	29.5903	26.1258	23.9484	5.56	22.9129	83.1935	5.1129	12.6774	3.68387	64.48	3630	30	0	1.09869	12.0096	64.6226	0.336922	111041	1249	7273	130594
2016	11	NOV 2016	1017.23	24.28	20.9633	18.54	5.74	17.6967	82.1667	4.14667	13	2.69333	64.48	4420	100	0
2016	12	DEC 2016	1022.6	21.7	17.7	14.4	7.3	12	70	8.8	14	0	64.48
